# Supplementary material
Source: publisher site journal article supplement (https://www.spandidos-publications.com/5418/downloadSupplementary)
Supplement: Supplementary file 1 [file downloadSupplementary]

## Sheet: supplementary Table S3
Table SIII: Significant DEGs in GSE79962.
ID	logFC	AveExpr	t	P.Value	adj.P.Val	B	regulation
LYVE1	-1.88839	7.32081	-9.0091	1.15e-08	6.64e-05	9.864	DOWN
TUBA3E	-1.94995	5.26478	-8.43249	3.46e-08	0.00012007	8.86463	DOWN
S100A9	-1.94151	5.41117	-7.28944	3.5e-07	0.000289499	6.73261	DOWN
SERPINA3	-2.82195	5.06084	-7.01516	6.26e-07	0.000402789	6.19103	DOWN
VSIG4	-1.81357	6.02425	-6.86479	8.65e-07	0.000484607	5.88928	DOWN
MYH6	-2.59643	8.91469	-6.77296	1.06e-06	0.000551838	5.70334	DOWN
TUBA3D	-1.60297	7.99346	-6.60913	1.51e-06	0.000628063	5.36852	DOWN
CD163	-1.6327	6.809	-6.59379	1.56e-06	0.0006287	5.33695	DOWN
RNASE2	-1.7631	3.65414	-6.03253	5.45e-06	0.00135185	4.1598	DOWN
PLA2G2A	-2.64352	7.6908	-5.44587	2.1e-05	0.00297318	2.88622	DOWN
F13A1	-1.58814	6.41913	-5.26048	3.23e-05	0.00384342	2.47597	DOWN
AQP4	-1.90121	4.51624	-5.20211	3.7e-05	0.00418929	2.34615	DOWN
DHRS7C	-2.09396	4.83869	-5.03208	5.53e-05	0.00533515	1.96639	DOWN
F5	-1.58278	4.1046	-4.65059	0.000136725	0.00955468	1.10743	DOWN
S100A8	-1.8948	6.55467	-4.25962	0.000348055	0.0158265	0.221941	DOWN
CORIN	-1.54205	6.17927	-3.29235	0.00346532	0.0573809	-1.9395	DOWN
HMGCS2	-1.68725	4.14815	-2.8169	0.0103189	0.108894	-2.94739	DOWN
HBA2	2.66286	5.57524	3.64535	0.0015086	0.034608	-1.1616	UP
NPPA	2.42473	7.89965	2.78069	0.011192	0.11382	-3.02161	UP
MLLT11	2.36372	7.37422	5.42715	2.19e-05	0.00306608	2.84494	UP
SFRP4	2.34309	3.93876	5.1227	4.46e-05	0.00472778	2.16908	UP
MXRA5	2.3237	4.47182	7.20301	4.2e-07	0.000330268	6.56318	UP
HBB	2.18402	7.12127	2.64538	0.0151163	0.135346	-3.29509	UP
TGFB2	2.15751	5.00191	5.38901	2.39e-05	0.0032108	2.76075	UP
EGR1	2.09987	7.30825	5.04259	5.39e-05	0.00529251	1.98995	UP
SMOC2	2.05999	5.47822	9.76796	2.87e-09	4.12e-05	11.104	UP
ASPN	1.92866	6.66337	5.03236	5.52e-05	0.00533515	1.96703	UP
LUM	1.92735	8.42736	6.90402	7.95e-07	0.000476021	5.96832	UP
PHLDA1	1.87168	5.41389	7.37989	2.9e-07	0.000288874	6.90868	UP
NEB	1.79602	3.66878	4.10194	0.000507648	0.019211	-0.13509	UP
OGN	1.76912	5.79327	6.19906	3.74e-06	0.0011215	4.51358	UP
TNNT1	1.71655	6.53084	4.79555	9.68e-05	0.00765774	1.43475	UP
FRZB	1.70939	4.40061	5.67168	1.24e-05	0.00242356	3.38116	UP
POSTN	1.69687	6.45162	2.54138	0.0189808	0.154497	-3.5008	UP
THBS4	1.66096	6.48047	3.85914	0.00090698	0.0259971	-0.682884	UP
PLCE1	1.64477	6.2997	7.05183	5.79e-07	0.000386763	6.2641	UP
TNNI1	1.64088	4.26391	4.6387	0.000140655	0.00966892	1.08056	UP
PTN	1.58867	6.57187	5.70183	1.16e-05	0.00231422	3.4468	UP
FMOD	1.55627	4.92449	3.8648	0.000894821	0.0259483	-0.670164	UP
NPR3	1.53611	5.55575	4.64985	0.000136967	0.00955468	1.10576	UP
